# Supplementary material
Source: Elsevier journal article supplement (https://univ-rennes.hal.science/hal-01475805v1/file/mmc1.pdf)
Supplement: mmc1 [file mmc1.pdf]

## Supplementary Material

### Remediation of an aged PCP-contaminated soil by chemical oxidation under flow-through conditions

V. Rybnikova<sup>1</sup>, N. Singhal<sup>2</sup>, K. Hanna<sup>1\*</sup>

<sup>1</sup>Ecole Nationale Supérieure de Chimie de Rennes, UMR CNRS 6226, 11 Allée  
de Beaulieu, 35708 Rennes Cedex 7, France.

<sup>2</sup>The University of Auckland, Department of Civil and Environmental  
Engineering, Private Bag 92019, Auckland  
1142, New Zealand

!

\* *Corresponding author:*

Ecole Nationale Supérieure de Chimie de Rennes  
11 Allée de Beaulieu, 35708 Rennes Cedex 7, France.

Tel: 00 33 2 23 23 80 27

[khalil.hanna@ensc-rennes.fr](mailto:khalil.hanna@ensc-rennes.fr)

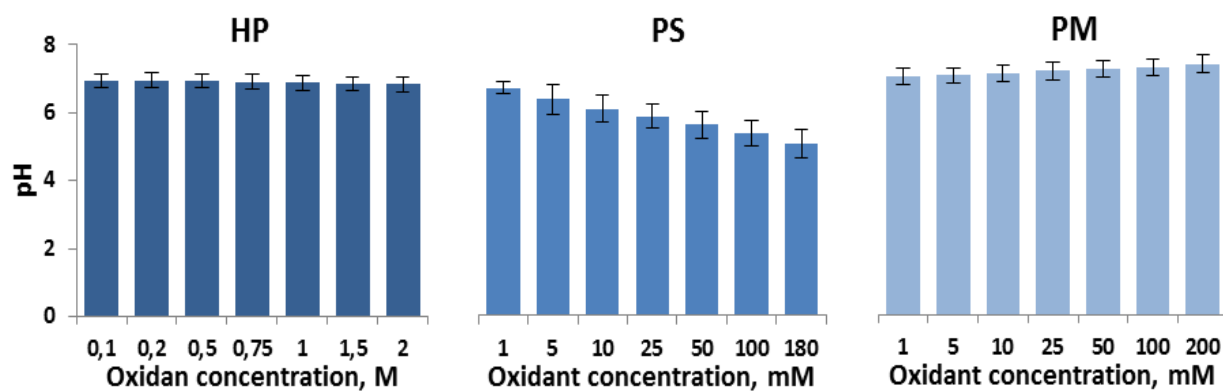

**Fig. S1.** pH of soil slurry at the beginning of batch reactions (after addition of oxidant) ; pH at the end of reactions is not shown as it did not change significantly ( $<0.2$ ): L/S ratio = 1/1.

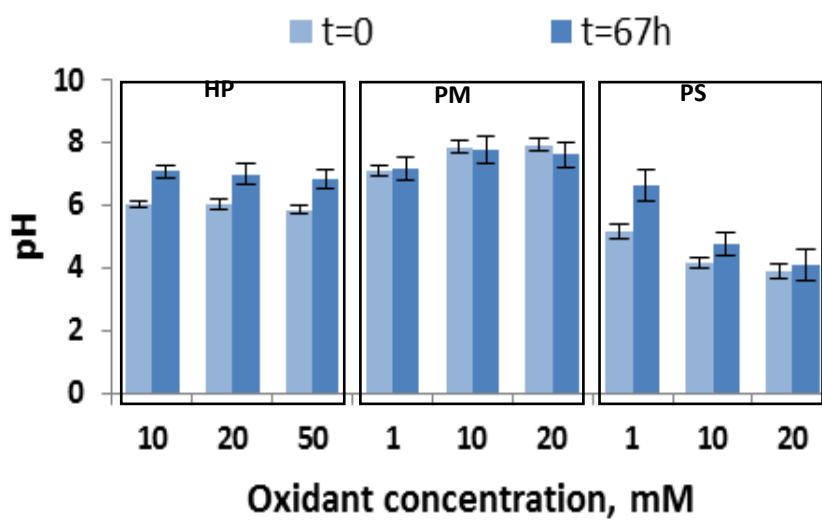

**Fig. S2.** pH of oxidant solution and effluents under water-saturated conditions. L/S ratio: 20/1; Flow rate: 0.25 ml min<sup>-1</sup>. t=0 is the pH value of oxidant solution to be injected, and t=67h is the final pH of column effluent. The same behavior was observed under water-unsaturated conditions.

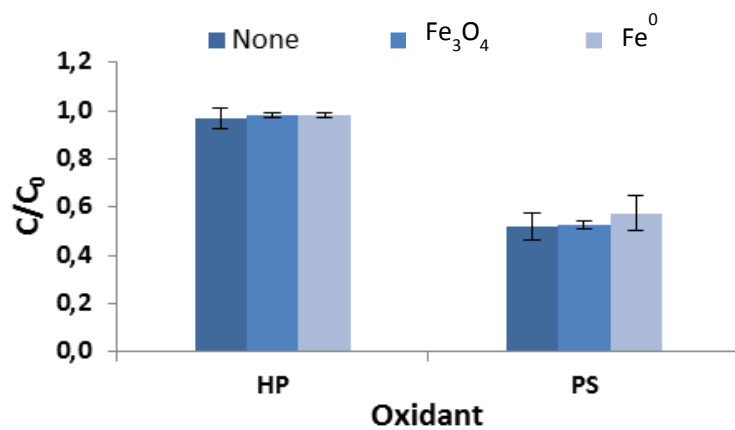

**Fig. S3.** PCP concentration in soil after chemical oxidation without and in presence of different Fe-based catalysts: [HP] = 100 mM; [PS] = 10 mM; L/S ratio = 1/1; [Fe<sup>0</sup>, Fe<sub>3</sub>O<sub>4</sub>] = 5 mg g<sup>-1</sup> of soil.

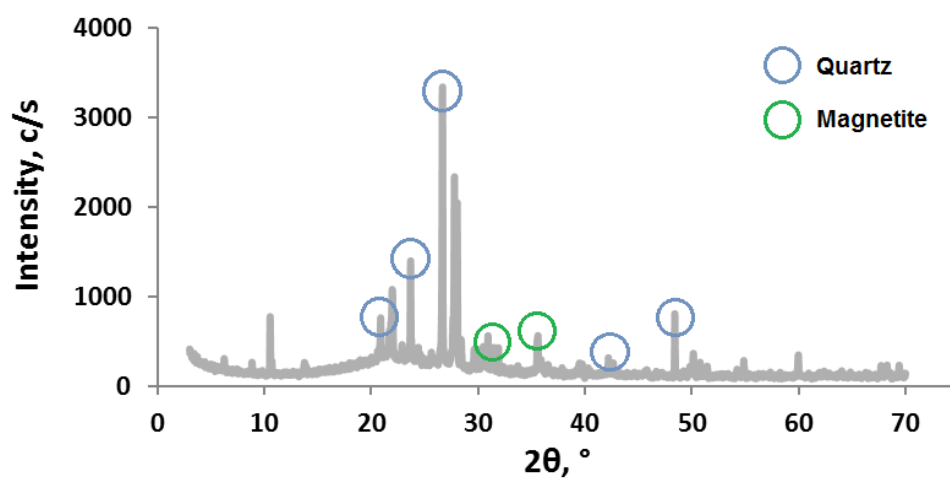

**Fig. S4.** XRD pattern of the investigated contaminated soil.
